# Supplementary material for: Comparative Anatomy of the Bony Labyrinth (Inner Ear) of Placental Mammals
Source: PubMed Central journal article supplement (PMC3689836; doi:10.1371/journal.pone.0066624), 2013-06-21
Supplement: pone.0066624.s001.pdf [file pone.0066624.s001.pdf]

TABLE S1. Taxa examined and scanning parameters<sup>a</sup>.

| <b>Taxon<sup>b</sup></b>                           | <b>Slices</b> | <b>Space</b> | <b>FR</b> | <b>Pixel</b> | <b>Size</b> |
|----------------------------------------------------|---------------|--------------|-----------|--------------|-------------|
| Marsupialia                                        |               |              |           |              |             |
| <i>Didelphis virginiana</i> (TMM M-2517)           | 111           | 0.132        | 61        | 0.0596       | 1024        |
| Eutheria                                           |               |              |           |              |             |
| <i>Kulbeckia kulbecke</i> (URBAC 04-36)            | 387           | 0.016        | 14.9      | 0.0146       | 1024        |
| <i>Ukhaatherium nessovi</i> (PSS-MAE 110)          | 59            | 0.080        | 15        | 0.0290       | 512         |
| <i>Zalambdalestes lechei</i> (PSS-MAE 108)         | 66            | 0.113        | 24.5      | 0.0479       | 512         |
| Zhelestid (URBAC 03-39)                            | 536           | 0.016        | 14.9      | 0.0146       | 1024        |
| Afrotheria                                         |               |              |           |              |             |
| Afrosoricida                                       |               |              |           |              |             |
| <i>Chrysochloris</i> sp. (AMNH 82372)              | 85            | 0.050        | 31        | 0.0303       | 1024        |
| <i>Hemicentetes semispinosum</i> (AMNH 100837)     | 56            | 0.067        | 48        | 0.0469       | 1024        |
| Macroscelidea                                      |               |              |           |              |             |
| <i>Macroscelides proboscideus</i> (AMNH 161535)    | 151           | 0.055        | 22.5      | 0.0220       | 1024        |
| Tubulidentata                                      |               |              |           |              |             |
| <i>Orycteropus afer</i> (AMNH 51909)               | 136           | 0.202        | 95        | 0.0930       | 1024        |
| Hyracoidea                                         |               |              |           |              |             |
| <i>Procavia capensis</i> (TMM M-4351)              | 180           | 0.799        | 70        | 0.0683       | 1024        |
| Sirenia                                            |               |              |           |              |             |
| <i>Trichechus manatus</i> (MSW 03156) <sup>c</sup> | 229           | 0.300        | 80        | 0.1563       | 512         |
| Proboscidea                                        |               |              |           |              |             |
| Elephantimorpha (TMM 933-950)                      | 275           | 0.134        | 53        | 0.0518       | 1024        |
| Xenarthra                                          |               |              |           |              |             |
| <i>Dasypus novemcinctus</i> (TMM M-152)            | 494           | 0.291        | 25        | 0.0244       | 1024        |
| Laurasiatheria                                     |               |              |           |              |             |
| Ceatartiodactyla                                   |               |              |           |              |             |
| <i>Bathygenys reevesi</i> (TMM 40209-198)          | 149           | 0.141        | 64        | 0.0625       | 1024        |
| <i>Sus scrofa</i> (TMM M-2689)                     | 601           | 0.033        | 31        | 0.0303       | 1024        |
| Balaenopteridae (TMM 42958-35)                     | 1131          | 0.072        | 64.8      | 0.0633       | 1024        |
| <i>Tursiops truncatus</i> (SDSNH 21212)            | 346           | 0.128        | 40        | 0.0391       | 1024        |
| Perissodactyla                                     |               |              |           |              |             |
| <i>Equus caballus</i> (TMM M-171)                  | 645           | 0.115        | 54        | 0.0567       | 1024        |
| Carnivora                                          |               |              |           |              |             |
| <i>Canis familiaris</i> (TMM M-150)                | 92            | 0.144        | 68        | 0.0664       | 1024        |
| <i>Eumetopias jubatus</i> (TMM M-171)              | 645           | 0.115        | 54        | 0.0527       | 1024        |
| <i>Felis catus</i> (TMM M-968)                     | 627           | 0.033        | 31        | 0.0303       | 1024        |
| Pholidota                                          |               |              |           |              |             |
| <i>Manis tricuspis</i> (AMNH 53896)                | 101           | 0.116        | 35.5      | 0.0347       | 1024        |
| Chiroptera                                         |               |              |           |              |             |
| <i>Pteropus lylei</i> (AMNH 237593)                | 188           | 0.447        | 41        | 0.0400       | 1024        |
| <i>Nycteris grandis</i> (AMNH 268369)              | 70            | 0.072        | 67        | 0.0654       | 1024        |
| <i>Rhinolophus ferrumequinum</i> (AMNH 245591)     | 45            | 0.097        | 44        | 0.0430       | 1024        |
| <i>Tadarida brasiliensis</i> (TMM M-3030)          | 380           | 0.010        | 9.9       | 0.0097       | 1024        |

TABLE S1. (Continued)

|                                           |      |       |       |        |      |  |
|-------------------------------------------|------|-------|-------|--------|------|--|
| Eulipotyphla                              |      |       |       |        |      |  |
| <i>Atelerix albiventris</i> (unvouchered) | 68   | 0.082 | 65    | 0.0635 | 1024 |  |
| <i>Sorex monticolus</i> (unvouchered)     | 130  | 0.265 | 12    | 0.0117 | 1024 |  |
| Euarchontoglires                          |      |       |       |        |      |  |
| Rodentia                                  |      |       |       |        |      |  |
| <i>Cavia porcellus</i> (TMM M-7283)       | 728  | 0.038 | 29.4  | 0.0287 | 1024 |  |
| <i>Mus musculus</i> (TMM M-3196)          | 84   | 0.044 | 12.6  | 0.0246 | 512  |  |
| Lagomorpha                                |      |       |       |        |      |  |
| <i>Lepus californicus</i> (TMM M-7500)    | 114  | 0.144 | 67    | 0.0654 | 1024 |  |
| <i>Sylvilagus floridanus</i> (TMM M-2689) | 325  | 0.034 | 30    | 0.0293 | 1024 |  |
| Primates                                  |      |       |       |        |      |  |
| <i>Macaca mulatta</i> (TMM M-5987)        | 1121 | 0.033 | 31    | 0.0303 | 1024 |  |
| <i>Homo sapiens</i> (UTO-HS01)            | 636  | 0.027 | 24.84 | 0.0272 | 1024 |  |
| Dermoptera                                |      |       |       |        |      |  |
| <i>Cynocephalus volans</i> (AMNH 187859)  | 350  | 0.028 | 22    | 0.0215 | 1024 |  |
| Scandentia                                |      |       |       |        |      |  |
| <i>Tupaia glis</i> (TMM M-2256)           | 537  | 0.038 | 59    | 0.0576 | 1024 |  |

<sup>a</sup> Definitions of parameters are as follows: FR, field of reconstruction refers to the dimensions of an individual CT slice, expressed in millimeters; Pixel, interpixel spacing, or vertical and horizontal dimensions of an individual pixel, expressed in millimeters, and calculated as FR/Size; Size, number of pixels in a CT slice, either 512X512 or 1024X1024 pixels; Slices, number of CT slices through the ear collected in the coronal (original) slice plane; Space, interslice spacing, or distance between consecutive slices, expressed in millimeters.

<sup>b</sup> Taxonomy and systematic arrangement follows published phylogenies [6,66].  
 Institutional abbreviations: AMNH, American Museum of Natural History, New York; MSW, Mortality South West; PSS-MAE, Collections of Joint Paleontological and Stratigraphic Section of the Geological Institute, Mongolian Academy of Science, Ulaanbaatar – American Museum of Natural History, New York; SDSNH, San Diego Society of Natural History, San Diego, CA; TMM, Texas Natural Science Center, Austin, TX; URBAC, Uzbekistan/ Russian/ British/ American/ Canadian joint paleontological expedition, Kyzylkum Desert, Uzbekistan, specimens in the Institute of Zoology, Tashkent; UTO-HS, University of Texas at Austin, Department of Anthropology Teaching Collection

<sup>c</sup> This specimen was the 156<sup>th</sup> Mortality South West in 2003, collected by S. Rommel at University of North Carolina Wilmington.
