# Supplementary material for: Comparative Anatomy of the Bony Labyrinth (Inner Ear) of Placental Mammals
Source: PubMed Central journal article supplement (PMC3689836; doi:10.1371/journal.pone.0066624), 2013-06-21
Supplement: pone.0066624.s002.pdf [file pone.0066624.s002.pdf]

TABLE S2. Additional information, imagery, and sources of data selected specimens. Further imagery is available at [http://morphobank.org/index.php/Projects/ProjectOverview/project\\_id/833](http://morphobank.org/index.php/Projects/ProjectOverview/project_id/833). Institutional abbreviations listed in Table S1.

| Taxon                                              | Online and Literature Data Sources                                                                                                              |
|----------------------------------------------------|-------------------------------------------------------------------------------------------------------------------------------------------------|
| Marsupialia                                        |                                                                                                                                                 |
| <i>Didelphis virginiana</i> (TMM M-2517)           | <a href="http://digimorph.org/specimens/Didelphis_virginiana/">http://digimorph.org/specimens/Didelphis_virginiana/</a>                         |
| Eutheria                                           |                                                                                                                                                 |
| <i>Kulbeckia kulbecke</i> (URBAC 04-36)            | [83,97]                                                                                                                                         |
| <i>Ukhaatherium nessovi</i> (PSS-MAE 110)          | [83]                                                                                                                                            |
| <i>Zalambdalestes lechei</i> (PSS-MAE 108)         | [83]                                                                                                                                            |
| Zhelestid (URBAC 03-39)                            | [83,97]                                                                                                                                         |
| Afrotheria                                         |                                                                                                                                                 |
| Afrosoricida                                       |                                                                                                                                                 |
| <i>Chrysochloris</i> sp. (AMNH 82372)              | <a href="http://digimorph.org/specimens/Chrysochloris_sp/head/">http://digimorph.org/specimens/Chrysochloris_sp/head/</a>                       |
| <i>Hemicentetes semispinosus</i> (AMNH 100837)     | <a href="http://digimorph.org/specimens/Hemicentetes_semispinosus/body/">http://digimorph.org/specimens/Hemicentetes_semispinosus/body/</a>     |
| Macroscelidea                                      |                                                                                                                                                 |
| <i>Macroscelides proboscideus</i> (AMNH 161535)    | <a href="http://digimorph.org/specimens/macroscelides_proboscideus/skull/">http://digimorph.org/specimens/macroscelides_proboscideus/skull/</a> |
| Tubulidentata                                      |                                                                                                                                                 |
| <i>Orycteropus afer</i> (AMNH 51909)               | <a href="http://digimorph.org/specimens/Orycteropus_afer/">http://digimorph.org/specimens/Orycteropus_afer/</a>                                 |
| Hyracoidea                                         |                                                                                                                                                 |
| <i>Procavia capensis</i> (TMM M-4351)              | <a href="http://digimorph.org/specimens/Procavia_capensis/">http://digimorph.org/specimens/Procavia_capensis/</a>                               |
| Sirenia                                            |                                                                                                                                                 |
| <i>Trichechus manatus</i> (MSW 03156) <sup>c</sup> | –                                                                                                                                               |
| Proboscidea                                        |                                                                                                                                                 |
| Elephantimorpha (TMM 933-950)                      | [84]                                                                                                                                            |
| Xenarthra                                          |                                                                                                                                                 |
| <i>Dasypus novemcinctus</i> (TMM M-152)            | [83]                                                                                                                                            |
| Laurasiatheria                                     |                                                                                                                                                 |
| Ceartiodactyla                                     |                                                                                                                                                 |
| <i>Bathygenys reevesi</i> (TMM 40209-198)          | <a href="http://digimorph.org/specimens/Bathygenys_reevesi/">http://digimorph.org/specimens/Bathygenys_reevesi/</a>                             |
| <i>Sus scrofa</i> (TMM M-2689)                     | –                                                                                                                                               |
| Balaenopteridae (TMM 42958-35)                     | –                                                                                                                                               |
| <i>Tursiops truncatus</i> (SDSNH 21212)            | <a href="http://digimorph.org/specimens/Tursiops_truncatus/">http://digimorph.org/specimens/Tursiops_truncatus/</a>                             |
| Perissodactyla                                     |                                                                                                                                                 |

|                                                |                                                                                                                                             |
|------------------------------------------------|---------------------------------------------------------------------------------------------------------------------------------------------|
| <i>Equus caballus</i> (TMM M-171)              | –                                                                                                                                           |
| Carnivora                                      |                                                                                                                                             |
| <i>Canis familiaris</i> (TMM M-150)            | <a href="http://digimorph.org/specimens/Canis_familiaris/chihuahua/">http://digimorph.org/specimens/Canis_familiaris/chihuahua/</a>         |
| <i>Eumetopias jubatus</i> (TMM M-171)          | –                                                                                                                                           |
| <i>Felis catus</i> (TMM M-968)                 | –                                                                                                                                           |
| Pholidota                                      |                                                                                                                                             |
| <i>Manis tricuspis</i> (AMNH 53896)            | <a href="http://digimorph.org/specimens/Manis_tricuspis/skull/">http://digimorph.org/specimens/Manis_tricuspis/skull/</a>                   |
| Chiroptera                                     |                                                                                                                                             |
| <i>Pteropus lylei</i> (AMNH 237593)            | <a href="http://digimorph.org/specimens/Pteropus_lylei/">http://digimorph.org/specimens/Pteropus_lylei/</a>                                 |
| <i>Nycteris grandis</i> (AMNH 268369)          | <a href="http://digimorph.org/specimens/Nycteris_grandis/head/">http://digimorph.org/specimens/Nycteris_grandis/head/</a>                   |
| <i>Rhinolophus ferrumequinum</i> (AMNH 245591) | <a href="http://digimorph.org/specimens/Rhinolophus_ferrumequinum/head/">http://digimorph.org/specimens/Rhinolophus_ferrumequinum/head/</a> |
| <i>Tadarida brasiliensis</i> (TMM M-3030)      | [83]                                                                                                                                        |
| Eulipotyphla                                   |                                                                                                                                             |
| <i>Atelerix albiventris</i> (uncatalogued)     | <a href="http://digimorph.org/specimens/Hedgehog_sp/head/">http://digimorph.org/specimens/Hedgehog_sp/head/</a>                             |
| <i>Sorex monticolus</i> (uncatalogued)         | <a href="http://digimorph.org/specimens/Sorex_monticolus/head/">http://digimorph.org/specimens/Sorex_monticolus/head/</a>                   |
| Euarchontoglires                               |                                                                                                                                             |
| Rodentia                                       |                                                                                                                                             |
| <i>Cavia porcellus</i> (TMM M-7283)            | <a href="http://digimorph.org/specimens/Cavia_porcellus/">http://digimorph.org/specimens/Cavia_porcellus/</a>                               |
| <i>Mus musculus</i> (TMM M-3196)               | <a href="http://digimorph.org/specimens/Mus_musculus/">http://digimorph.org/specimens/Mus_musculus/</a>                                     |
| Lagomorpha                                     |                                                                                                                                             |
| <i>Lepus californicus</i> (TMM M-7500)         | <a href="http://digimorph.org/specimens/Lepus_californicus/">http://digimorph.org/specimens/Lepus_californicus/</a>                         |
| <i>Sylvilagus floridanus</i> (TMM M-2689)      | –                                                                                                                                           |
| Primates                                       |                                                                                                                                             |
| <i>Macaca mulatta</i> (TMM M-5987)             | –                                                                                                                                           |
| <i>Homo sapiens</i> (UTO-HS01)                 | <a href="http://digimorph.org/specimens/Homo_sapiens/">http://digimorph.org/specimens/Homo_sapiens/</a>                                     |
| Dermoptera                                     |                                                                                                                                             |
| <i>Cynocephalus volans</i> (AMNH 187859)       | –                                                                                                                                           |
| Scandentia                                     |                                                                                                                                             |
| <i>Tupaia glis</i> (TMM M-2256)                | –                                                                                                                                           |

---
