# Supplementary material for: Comparative Anatomy of the Bony Labyrinth (Inner Ear) of Placental Mammals
Source: PubMed Central journal article supplement (PMC3689836; doi:10.1371/journal.pone.0066624), 2013-06-21
Supplement: pone.0066624.s003.pdf [file pone.0066624.s003.pdf]

TABLE S3. Ancestral character state reconstructions for ancestral nodes in text Figure 2<sup>a</sup>.

| Node Names                              | LSC Entry             | LSC Position | Largest Canal | Cochlea Ratio | Coiling   | % Cochlea |
|-----------------------------------------|-----------------------|--------------|---------------|---------------|-----------|-----------|
| A. Theria                               | secondary common crus | low          | anterior      | low           | 1-2 turns | 51-75%    |
| B. Eutheria                             | secondary common crus | low          | anterior      | low           | 1-2 turns | 51-75%    |
| C. <i>Ukhatherium</i> -Placentalia      | secondary common crus | low          | anterior      | low           | 1-2 turns | 51-75%    |
| D. <i>Zalambdalestidae</i> +Placentalia | secondary common crus | low          | anterior      | low           | 1-2 turns | ≤50%      |
| E. <i>Zalamdalestidae</i>               | secondary common crus | low          | anterior      | low           | 1-2 turns | ≤50%      |
| F. Placentalia                          | vestibule             | –            | anterior      | –             | 1-2 turns | 51-75%    |
| G. Afrotheria                           | vestibule             | –            | anterior      | –             | 1-2 turns | 51-75%    |
| H. Afrosoricida+ <i>Macroscelides</i>   | vestibule             | high         | anterior      | –             | 1-2 turns | 51-75%    |
| I. Afrosoricida                         | vestibule             | high         | anterior      | –             | 1-2 turns | 51-75%    |
| J. Paenungulata                         | vestibule             | –            | anterior      | –             | 1-2 turns | –         |
| K. <i>Procavia</i> + <i>Trichechus</i>  | vestibule             | –            | –             | –             | 1-2 turns | –         |
| L. Boreoeutheria                        | vestibule             | high         | anterior      | –             | 1-2 turns | 51-75%    |
| M. Laurasiatheria                       | vestibule             | high         | anterior      | –             | 1-2 turns | 51-75%    |
| N. Ungulates+Ferae+Chiroptera           | vestibule             | high         | anterior      | –             | –         | 51-75%    |
| O. Cetartiodactyla+Perissodactyla       | vestibule             | high         | anterior      | low           | –         | 51-75%    |
| P. Cetartiodactyla                      | vestibule             | high         | anterior      | low           | –         | 51-75%    |
| Q. <i>Sus</i> +Cetacea                  | vestibule             | high         | anterior      | low           | –         | 51-75%    |
| R. Cetacea                              | posterior ampulla     | low          | anterior      | low           | –         | >75%      |
| S. Ferae                                | vestibule             | high         | anterior      | –             | –         | 51-75%    |
| T. Carnivora                            | posterior ampulla     | high         | anterior      | high          | –         | 51-75%    |
| U. Caniformia                           | posterior ampulla     | low          | anterior      | high          | –         | 51-75%    |
| V. Chiroptera                           | vestibule             | high         | anterior      | high          | –         | 51-75%    |
| W. Microchiroptera                      | –                     | high         | anterior      | high          | 3+ turns  | 51-75%    |
| X. <i>Rhinolophus</i> + <i>Tadarida</i> | –                     | high         | anterior      | high          | 3+ turns  | 51-75%    |
| Y. Eulipotyphla                         | vestibule             | high         | anterior      | –             | 1-2 turns | ≤50%      |
| Z. Euarchontoglires                     | vestibule             | high         | anterior      | –             | 1-2 turns | 51-75%    |
| a. Glires                               | vestibule             | high         | anterior      | high          | 1-2 turns | 51-75%    |
| b. Rodentia                             | vestibule             | high         | anterior      | high          | 1-2 turns | 51-75%    |

|                  |           |      |          |      |           |        |
|------------------|-----------|------|----------|------|-----------|--------|
| c. Lagomorpha    | vestibule | high | anterior | high | 1-2 turns | 51-75% |
| d. Primatomorpha | vestibule | high | anterior | low  | 3+ turns  | ≤50%   |
| e. Primates      | vestibule | high | anterior | low  | 3+ turns  | ≤50%   |

<sup>a</sup> Letters in the first column refer to node labels in text Figure 2. Ancestral states reconstructed in Mesquite [94]. Definitions of characters: LSC Entry, entry of the posterior limb of the lateral semicircular canal into the secondary common crus, posterior ampulla, or vestibule; LSC Position, position of the plane of the lateral semicircular canal relative to the inferior limb of the posterior semicircular canal when the bony labyrinth is in anterior view; Largest Canal, largest semicircular canal arc radius of curvature among the anterior, lateral, and posterior semicircular canals; Cochlea Ratio, aspect ratio of cochlear spiral binned as either low (ratio equaling 0.55 or below) or high (ratio above 0.55), numerical values reported in text; Coiling, number of turns completed by the cochlea binned as 1-2 turns (360-720°), 2-3 turns (720-1080°), or 3+ turns (over 1080°), numerical values reported in text; % Cochlea, percent volume of the cochlea to total labyrinthine volume binned as ≤50%, 51-75%, or >75%, numerical values reported in text.
